# Supplementary material for: Burden of Disease (BoD) Assessment to Estimate Risk Factors Impact in a Real Nanomanufacturing Scenario
Source: MDPI journal article supplement (doi:10.3390/nano12224089), 2022-11-21

|                 |                             |                                                      |
|-----------------|-----------------------------|------------------------------------------------------|
|                 | <b>Naam</b>                 | <b>Omschrijving</b>                                  |
| <b>PROJECT</b>  | Witek TiO2                  | Emission impact assessment for Witek coating process |
| <b>SCENARIO</b> | Coating with single machine |                                                      |

## Parametrisatie

|                      |                                      |                                                     |                              |                   |                                 |
|----------------------|--------------------------------------|-----------------------------------------------------|------------------------------|-------------------|---------------------------------|
| <b>Naam Polluent</b> | <b>Droge depositiesnelheid (m/s)</b> | <b>Uitwascoëfficiënt <math>\lambda</math> (s-1)</b> | <b>Molaire massa (g/mol)</b> | <b>% stikstof</b> | <b>Zuurequivalent (Zeq/mol)</b> |
| TiO2                 | 0                                    | 4.0E-4                                              |                              |                   |                                 |

|                                 |     |                                                |           |
|---------------------------------|-----|------------------------------------------------|-----------|
| <b>Receptorhoogte (m)</b>       | 1,5 | <b>Gebruikt meteobestand</b>                   | 2007-2011 |
| <b>Perctielen berekenen</b>     | Nee | <b>Achtergrondconcentratiekaart</b>            | Geen      |
| <b>Stack downwash gebruiken</b> | Ja  | <b>Koppeling VLOPS-depositiesnelhedenkaart</b> | UIT       |

## Bronkarakteristieken

|                       |             |
|-----------------------|-------------|
| <b>Naam</b>           | <b>Type</b> |
| LEV stack             | Puntbron    |
| Fugitive point source | Puntbron    |

## Bron LEV stack

|                                        |           |                                               |          |
|----------------------------------------|-----------|-----------------------------------------------|----------|
| <b>Naam</b>                            | LEV stack | <b>Hoogte (m)</b>                             | 13       |
| <b>NO/NOx verhouding (%)</b>           |           | <b>Werkingsregime</b>                         | variabel |
| <b>Temperatuurafhankelijk</b>          | Nee       | <b>Uittreedsnelheid (m/s)</b>                 | 3,11     |
| <b>Windafhankelijk</b>                 | Nee       |                                               |          |
| <b>Diameter (m)</b>                    | 0,6       | <b>Temperatuur (K)</b>                        | 296,15   |
| <b>Volumestroom (Nm<sup>3</sup>/s)</b> | 0,81      | <b>Mechanische pluimstijging uitschakelen</b> | Nee      |
| <b>Locatie</b>                         |           | <b>X</b>                                      | 100000   |
|                                        |           | <b>Y</b>                                      | 200000   |

## Emissies LEV stack

|                 |               |                      |                     |
|-----------------|---------------|----------------------|---------------------|
| <b>Polluent</b> | <b>Waarde</b> | <b>Massa eenheid</b> | <b>Tijdseenheid</b> |
| TiO2            | 149,82        | mg                   | minuut              |

## Effectieve pluimhoogte LEV stack

| Stab. klasse | Windsnelheidsklasse (m/s op 24 m) |    |    |    |    |    |    |    |    |    |    |    |    |    |    |
|--------------|-----------------------------------|----|----|----|----|----|----|----|----|----|----|----|----|----|----|
|              | 1                                 | 2  | 3  | 4  | 5  | 6  | 7  | 8  | 9  | 10 | 11 | 12 | 13 | 14 | 15 |
| E1           | 19                                | 17 | 15 | 14 | 13 | 13 | 12 | 12 | 12 | 12 | 11 | 11 | 11 | 11 | 11 |
| E2           | 19                                | 17 | 15 | 14 | 13 | 13 | 12 | 12 | 12 | 12 | 11 | 11 | 11 | 11 | 11 |
| E3           | 20                                | 16 | 15 | 14 | 13 | 12 | 12 | 12 | 12 | 11 | 11 | 11 | 11 | 11 | 11 |
| E4           | 19                                | 16 | 15 | 13 | 13 | 12 | 12 | 12 | 12 | 11 | 11 | 11 | 11 | 11 | 11 |
| E5           | 19                                | 16 | 14 | 13 | 13 | 12 | 12 | 12 | 11 | 11 | 11 | 11 | 11 | 11 | 11 |
| E6           | 19                                | 16 | 14 | 13 | 13 | 12 | 12 | 12 | 11 | 11 | 11 | 11 | 11 | 11 | 11 |
| E7           | 20                                | 16 | 15 | 14 | 13 | 12 | 12 | 12 | 12 | 11 | 11 | 11 | 11 | 11 | 11 |

## Bron Fugitive point source

|                                        |                       |                                               |           |
|----------------------------------------|-----------------------|-----------------------------------------------|-----------|
| <b>Naam</b>                            | Fugitive point source | <b>Hoogte (m)</b>                             | 3         |
| <b>NO/NOx verhouding (%)</b>           |                       | <b>Werkingsregime</b>                         | variabel  |
| <b>Temperatuurafhankelijk</b>          | Nee                   | <b>Uittreedsnelheid (m/s)</b>                 | 0,02      |
| <b>Windafhankelijk</b>                 | Nee                   |                                               |           |
| <b>Diameter (m)</b>                    | 10                    | <b>Temperatuur (K)</b>                        | 296,15    |
| <b>Volumestroom (Nm<sup>3</sup>/s)</b> | 1,5                   | <b>Mechanische pluimstijging uitschakelen</b> | Ja        |
| <b>Locatie</b>                         |                       | <b>X</b>                                      | 100001,13 |
|                                        |                       | <b>Y</b>                                      | 199998,63 |

## Emissies Fugitive point source

|                 |               |                      |                     |
|-----------------|---------------|----------------------|---------------------|
| <b>Polluent</b> | <b>Waarde</b> | <b>Massa eenheid</b> | <b>Tijdseenheid</b> |
| TiO2            | 15,1          | mg                   | minuut              |

## Effectieve pluimhoogte Fugitive point source

| Stab. klasse | Windsnelheidsklasse (m/s op 24 m) |   |   |   |   |   |   |   |   |    |    |    |    |    |    |
|--------------|-----------------------------------|---|---|---|---|---|---|---|---|----|----|----|----|----|----|
|              | 1                                 | 2 | 3 | 4 | 5 | 6 | 7 | 8 | 9 | 10 | 11 | 12 | 13 | 14 | 15 |
| E1           | 7                                 | 3 | 2 | 2 | 1 | 1 | 1 | 1 | 1 | 1  | 1  | 1  | 1  | 0  | 0  |
| E2           | 7                                 | 3 | 2 | 2 | 1 | 1 | 1 | 1 | 1 | 1  | 1  | 1  | 1  | 0  | 0  |
| E3           | 7                                 | 3 | 2 | 2 | 1 | 1 | 1 | 1 | 1 | 1  | 1  | 1  | 1  | 0  | 0  |
| E4           | 9                                 | 5 | 3 | 2 | 2 | 2 | 1 | 1 | 1 | 1  | 1  | 1  | 1  | 1  | 1  |
| E5           | 9                                 | 4 | 3 | 2 | 2 | 1 | 1 | 1 | 1 | 1  | 1  | 1  | 1  | 1  | 1  |
| E6           | 8                                 | 4 | 3 | 2 | 2 | 1 | 1 | 1 | 1 | 1  | 1  | 1  | 1  | 1  | 1  |
| E7           | 7                                 | 3 | 2 | 2 | 1 | 1 | 1 | 1 | 1 | 1  | 1  | 1  | 1  | 0  | 0  |

# Receptoren

| Type            | Aantal receptoren |
|-----------------|-------------------|
| Receptor punten | 0                 |
| Grids           | 400               |
| Totaal          | 400               |

# Berekening IMPACTS(build.version)

| Id       | Berekend door        | Einde berekening    | Invoerbestand              | Uitvoerbestand              |
|----------|----------------------|---------------------|----------------------------|-----------------------------|
| 44651914 | Antti Jonas Koivisto | 11/05/2022 10:54:15 | ifdmjob-44651914-input.zip | ifdmjob-44651914-output.zip |

# Visualisaties

| Id       | Laatst gewijzigd op | Laatst gewijzigd door | Polluent | Grootheid    | Metriek    | Eenheid |
|----------|---------------------|-----------------------|----------|--------------|------------|---------|
| 44303248 | 29/04/2022 09:48:55 | Antti Jonas Koivisto  | TiO2     | Concentratie | Gemiddelde | ng/m³   |

## TiO2 (Concentratie Gemiddelde ng/m³)

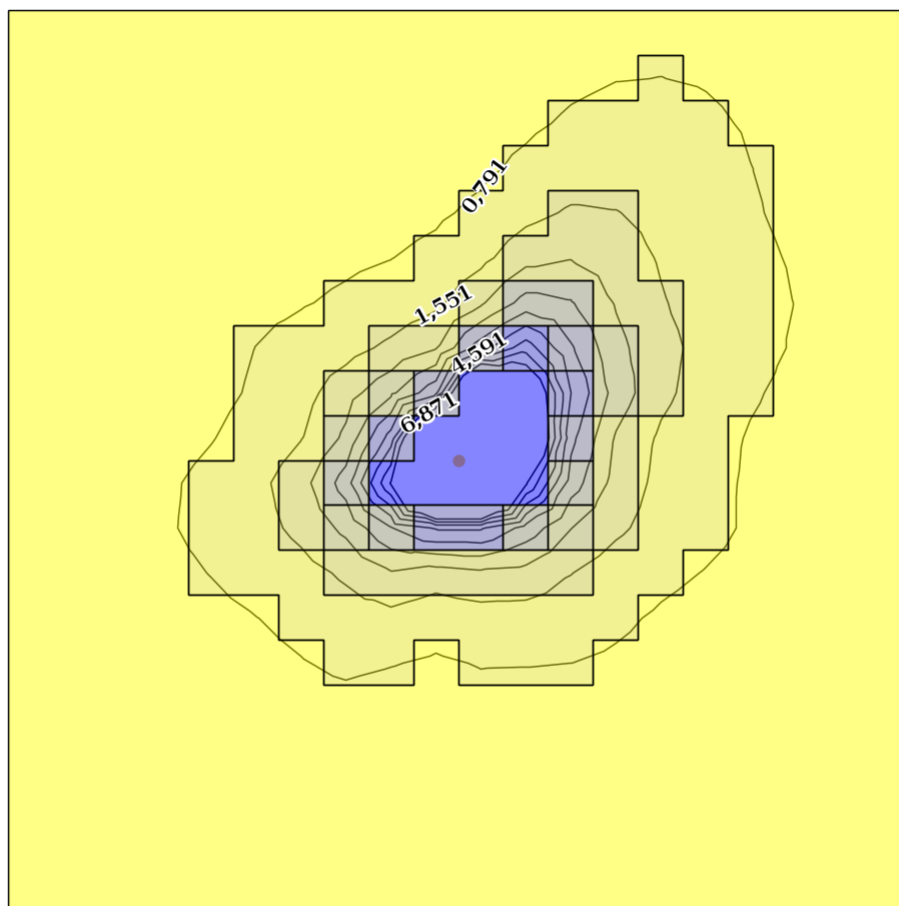

METER  
0 160 320

|                 |                 |                 |                 |
|-----------------|-----------------|-----------------|-----------------|
| [0,031 - 0,791[ | [0,791 - 1,551[ | [1,551 - 2,311[ | [2,311 - 3,071[ |
| [3,071 - 3,831[ | [3,831 - 4,591[ | [4,591 - 5,351[ | [5,351 - 6,111[ |
| [6,111 - 6,871[ | ≥ 6,871         |                 |                 |

| Id       | Laatst gewijzigd op | Laatst gewijzigd door | Polluent | Grootheid | Metriek    | Eenheid   |
|----------|---------------------|-----------------------|----------|-----------|------------|-----------|
| 44303259 | 11/05/2022 10:45:51 | Antti Jonas Koivisto  | TiO2     | Depositie | Gemiddelde | µg/m²/dag |

# TiO2 (Depositie Gemiddelde $\mu\text{g}/\text{m}^2/\text{dag}$ )

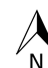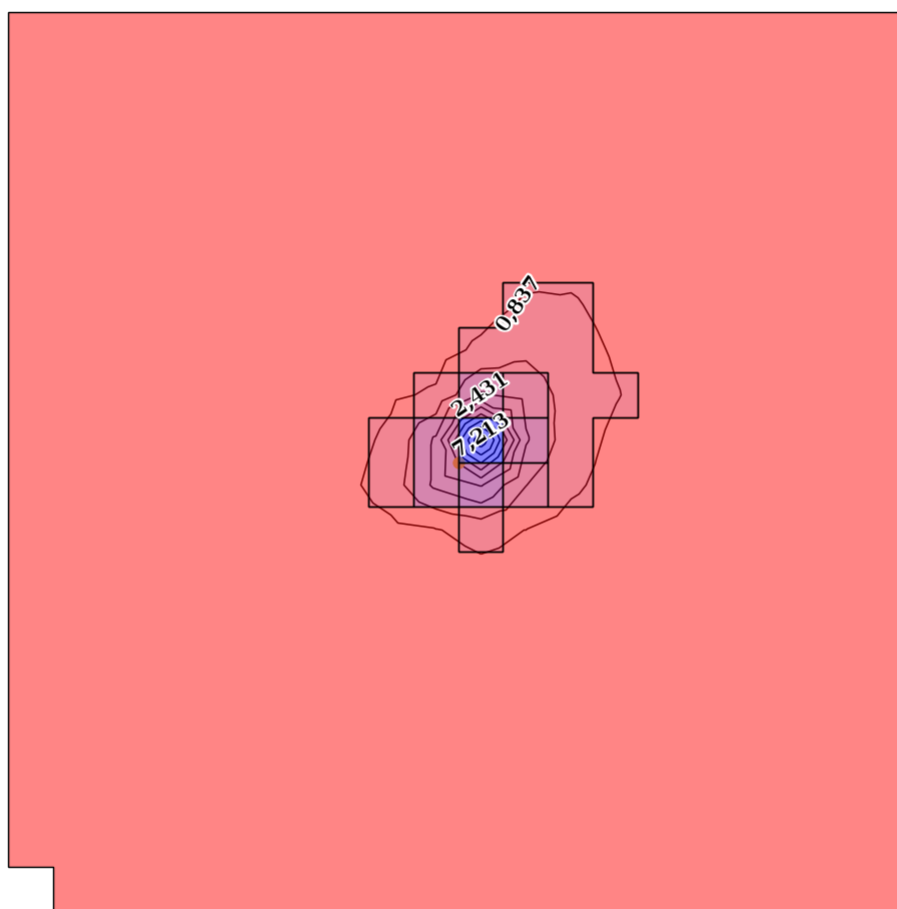

METER  
0 160 320

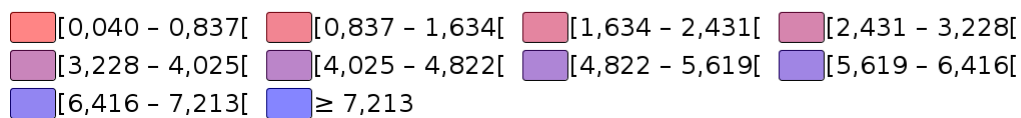

|                 |                             |                                                      |
|-----------------|-----------------------------|------------------------------------------------------|
|                 | <b>Naam</b>                 | <b>Omschrijving</b>                                  |
| <b>PROJECT</b>  | Witek Ag                    | Emission impact assessment for Witek coating process |
| <b>SCENARIO</b> | Coating with single machine |                                                      |

## Parametrisatie

|                      |                                      |                                                     |                              |                   |                                 |
|----------------------|--------------------------------------|-----------------------------------------------------|------------------------------|-------------------|---------------------------------|
| <b>Naam Polluent</b> | <b>Droge depositiesnelheid (m/s)</b> | <b>Uitwascoëfficiënt <math>\lambda</math> (s-1)</b> | <b>Molaire massa (g/mol)</b> | <b>% stikstof</b> | <b>Zuurequivalent (Zeq/mol)</b> |
| SILVER               | 0                                    | 4.0E-4                                              |                              |                   |                                 |

|                                 |     |                                                |           |
|---------------------------------|-----|------------------------------------------------|-----------|
| <b>Receptorhoogte (m)</b>       | 1,5 | <b>Gebruikt meteobestand</b>                   | 2007-2011 |
| <b>Perctielen berekenen</b>     | Nee | <b>Achtergrondconcentratiekaart</b>            | Geen      |
| <b>Stack downwash gebruiken</b> | Ja  | <b>Koppeling VLOPS-depositiesnelhedenkaart</b> | UIT       |

## Bronkarakteristieken

|                       |             |
|-----------------------|-------------|
| <b>Naam</b>           | <b>Type</b> |
| LEV stack             | Puntbron    |
| Fugitive point source | Puntbron    |

## Bron LEV stack

|                                        |           |                                               |          |
|----------------------------------------|-----------|-----------------------------------------------|----------|
| <b>Naam</b>                            | LEV stack | <b>Hoogte (m)</b>                             | 13       |
| <b>NO/NOx verhouding (%)</b>           |           | <b>Werkingsregime</b>                         | variabel |
| <b>Temperatuurafhankelijk</b>          | Nee       | <b>Uittreedsnelheid (m/s)</b>                 | 3,11     |
| <b>Windafhankelijk</b>                 | Nee       |                                               |          |
| <b>Diameter (m)</b>                    | 0,6       | <b>Temperatuur (K)</b>                        | 296,15   |
| <b>Volumestroom (Nm<sup>3</sup>/s)</b> | 0,81      | <b>Mechanische pluimstijging uitschakelen</b> | Nee      |
| <b>Locatie</b>                         |           | <b>X</b>                                      | 100000   |
|                                        |           | <b>Y</b>                                      | 200000   |

## Emissies LEV stack

|                 |               |                      |                     |
|-----------------|---------------|----------------------|---------------------|
| <b>Polluent</b> | <b>Waarde</b> | <b>Massa eenheid</b> | <b>Tijdseenheid</b> |
| SILVER          | 2,8           | mg                   | minuut              |

## Effectieve pluimhoogte LEV stack

| Stab. klasse | Windsnelheidsklasse (m/s op 24 m) |    |    |    |    |    |    |    |    |    |    |    |    |    |    |
|--------------|-----------------------------------|----|----|----|----|----|----|----|----|----|----|----|----|----|----|
|              | 1                                 | 2  | 3  | 4  | 5  | 6  | 7  | 8  | 9  | 10 | 11 | 12 | 13 | 14 | 15 |
| E1           | 19                                | 17 | 15 | 14 | 13 | 13 | 12 | 12 | 12 | 12 | 11 | 11 | 11 | 11 | 11 |
| E2           | 19                                | 17 | 15 | 14 | 13 | 13 | 12 | 12 | 12 | 12 | 11 | 11 | 11 | 11 | 11 |
| E3           | 20                                | 16 | 15 | 14 | 13 | 12 | 12 | 12 | 12 | 11 | 11 | 11 | 11 | 11 | 11 |
| E4           | 19                                | 16 | 15 | 13 | 13 | 12 | 12 | 12 | 12 | 11 | 11 | 11 | 11 | 11 | 11 |
| E5           | 19                                | 16 | 14 | 13 | 13 | 12 | 12 | 12 | 11 | 11 | 11 | 11 | 11 | 11 | 11 |
| E6           | 19                                | 16 | 14 | 13 | 13 | 12 | 12 | 12 | 11 | 11 | 11 | 11 | 11 | 11 | 11 |
| E7           | 20                                | 16 | 15 | 14 | 13 | 12 | 12 | 12 | 12 | 11 | 11 | 11 | 11 | 11 | 11 |

## Bron Fugitive point source

|                                        |                       |                                               |           |
|----------------------------------------|-----------------------|-----------------------------------------------|-----------|
| <b>Naam</b>                            | Fugitive point source | <b>Hoogte (m)</b>                             | 3         |
| <b>NO/NOx verhouding (%)</b>           |                       | <b>Werkingsregime</b>                         | variabel  |
| <b>Temperatuurafhankelijk</b>          | Nee                   | <b>Uittreedsnelheid (m/s)</b>                 | 0,02      |
| <b>Windafhankelijk</b>                 | Nee                   |                                               |           |
| <b>Diameter (m)</b>                    | 10                    | <b>Temperatuur (K)</b>                        | 296,15    |
| <b>Volumestroom (Nm<sup>3</sup>/s)</b> | 1,5                   | <b>Mechanische pluimstijging uitschakelen</b> | Ja        |
| <b>Locatie</b>                         |                       | <b>X</b>                                      | 100001,13 |
|                                        |                       | <b>Y</b>                                      | 199998,63 |

## Emissies Fugitive point source

|                 |               |                      |                     |
|-----------------|---------------|----------------------|---------------------|
| <b>Polluent</b> | <b>Waarde</b> | <b>Massa eenheid</b> | <b>Tijdseenheid</b> |
| SILVER          | 23,2          | µg                   | minuut              |

## Effectieve pluimhoogte Fugitive point source

| Stab. klasse | Windsnelheidsklasse (m/s op 24 m) |   |   |   |   |   |   |   |   |    |    |    |    |    |    |
|--------------|-----------------------------------|---|---|---|---|---|---|---|---|----|----|----|----|----|----|
|              | 1                                 | 2 | 3 | 4 | 5 | 6 | 7 | 8 | 9 | 10 | 11 | 12 | 13 | 14 | 15 |
| E1           | 7                                 | 3 | 2 | 2 | 1 | 1 | 1 | 1 | 1 | 1  | 1  | 1  | 1  | 0  | 0  |
| E2           | 7                                 | 3 | 2 | 2 | 1 | 1 | 1 | 1 | 1 | 1  | 1  | 1  | 1  | 0  | 0  |
| E3           | 7                                 | 3 | 2 | 2 | 1 | 1 | 1 | 1 | 1 | 1  | 1  | 1  | 1  | 0  | 0  |
| E4           | 9                                 | 5 | 3 | 2 | 2 | 2 | 1 | 1 | 1 | 1  | 1  | 1  | 1  | 1  | 1  |
| E5           | 9                                 | 4 | 3 | 2 | 2 | 1 | 1 | 1 | 1 | 1  | 1  | 1  | 1  | 1  | 1  |
| E6           | 8                                 | 4 | 3 | 2 | 2 | 1 | 1 | 1 | 1 | 1  | 1  | 1  | 1  | 1  | 1  |
| E7           | 7                                 | 3 | 2 | 2 | 1 | 1 | 1 | 1 | 1 | 1  | 1  | 1  | 1  | 0  | 0  |

# Receptoren

| Type            | Aantal receptoren |
|-----------------|-------------------|
| Receptor punten | 0                 |
| Grids           | 400               |
| Totaal          | 400               |

# Berekening IMPACTS(build.version)

| Id       | Berekend door        | Einde berekening    | Invoerbestand              | Uitvoerbestand              |
|----------|----------------------|---------------------|----------------------------|-----------------------------|
| 44653745 | Antti Jonas Koivisto | 11/05/2022 12:52:56 | ifdmjob-44653745-input.zip | ifdmjob-44653745-output.zip |

# Visualisaties

| Id       | Laatst gewijzigd op | Laatst gewijzigd door | Polluent | Grootheid    | Metriek    | Eenheid |
|----------|---------------------|-----------------------|----------|--------------|------------|---------|
| 44653722 | 11/05/2022 12:53:50 | Antti Jonas Koivisto  | SILVER   | Concentratie | Gemiddelde | pg/m³   |

## SILVER (Concentratie Gemiddelde pg/m³)

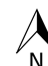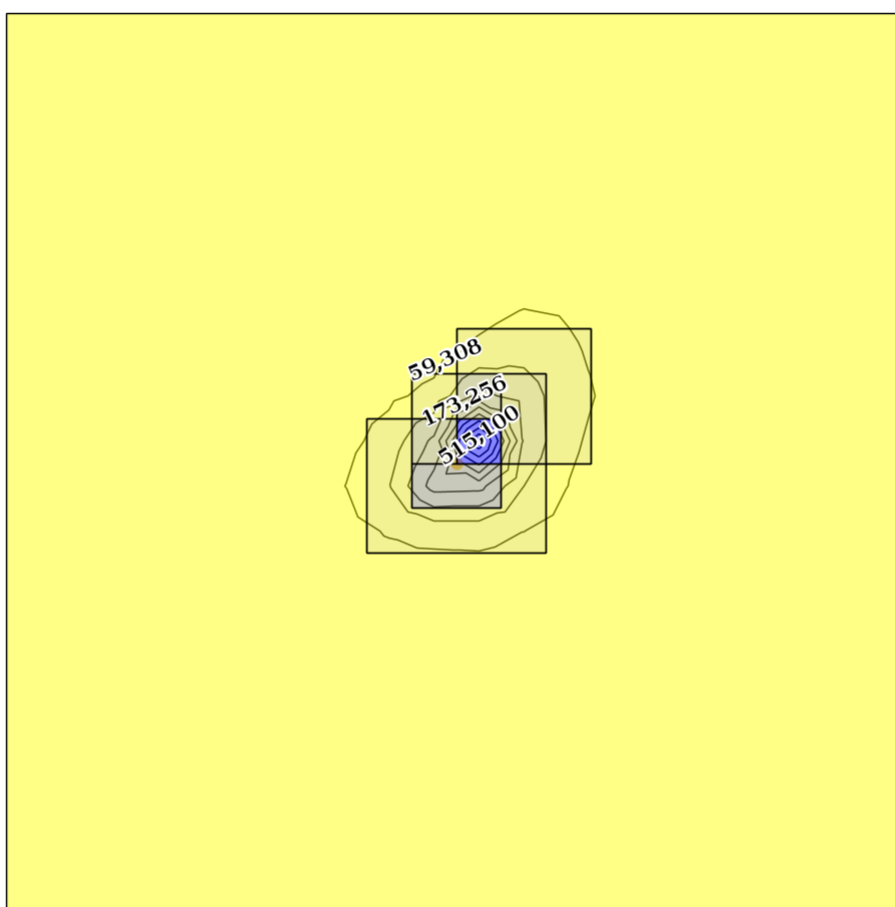

METER  
0 160 320

|                     |                     |                     |
|---------------------|---------------------|---------------------|
| [2,334 - 59,308[    | [59,308 - 116,282[  | [116,282 - 173,256[ |
| [173,256 - 230,230[ | [230,230 - 287,204[ | [287,204 - 344,178[ |
| [344,178 - 401,152[ | [401,152 - 458,126[ | [458,126 - 515,100[ |
| ≥ 515,100           |                     |                     |

| Id       | Laatst gewijzigd op | Laatst gewijzigd door | Polluent | Grootheid | Metriek    | Eenheid   |
|----------|---------------------|-----------------------|----------|-----------|------------|-----------|
| 44653733 | 11/05/2022 12:57:31 | Antti Jonas Koivisto  | SILVER   | Depositie | Gemiddelde | µg/m²/dag |

# SILVER (Depositie Gemiddelde $\mu\text{g}/\text{m}^2/\text{dag}$ )

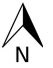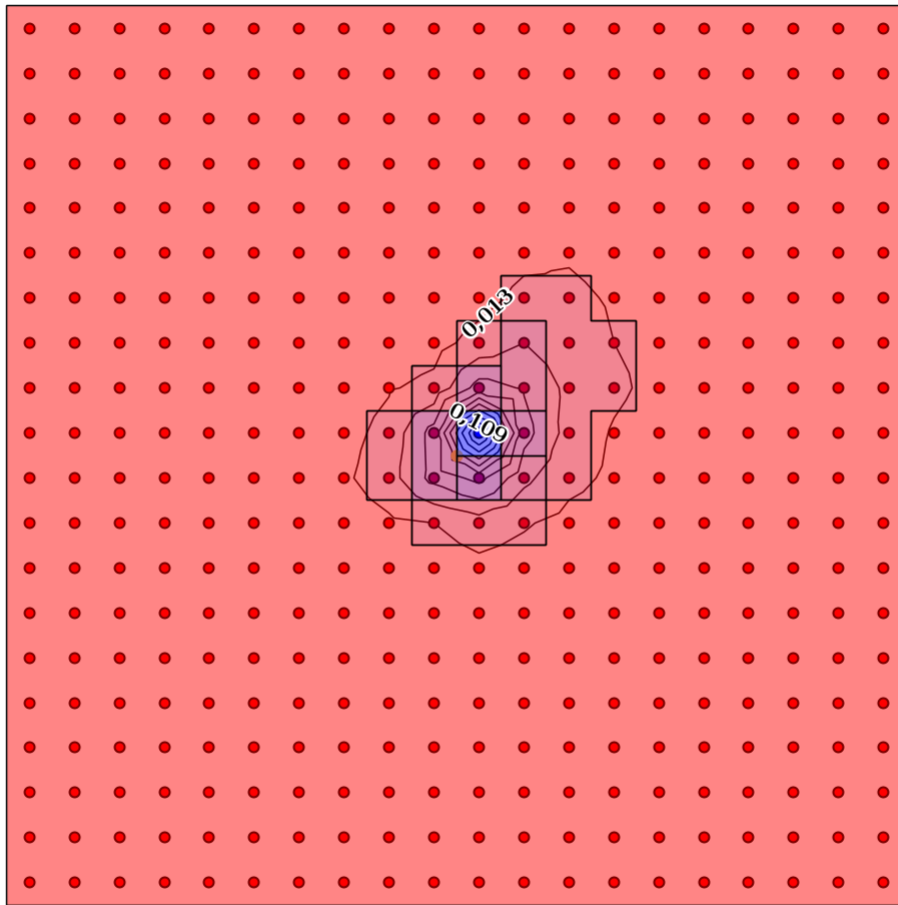

METER  
0 160 320

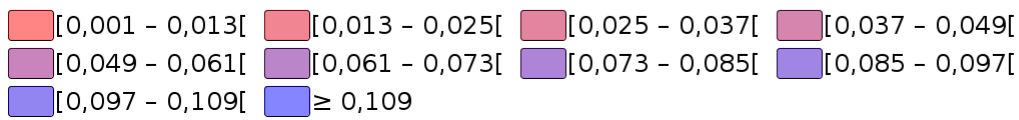

Supplement: s1 [file s1]
